# Supplementary material for: Citation impact and reach of the IOC sport and exercise medicine consensus statements
Source: HighWire-hosted journal article supplement (doi:10.1136/bmjsem-2022-001460), 2023-02-01
Supplement: bmjsem-2022-001460supp001_data_supplement.pdf [file bmjsem-2022-001460supp001_data_supplement.pdf]

**Supplementary file: sources contributing to each 'core' IOC-statement.****Fortington et al 2022: the citation impact and reach of the IOC sport and exercise medicine consensus statements**

| EID                | DOI                               | IOC consensus meeting title                                            | Availability           | Year                               | Publication                                                      |
|--------------------|-----------------------------------|------------------------------------------------------------------------|------------------------|------------------------------------|------------------------------------------------------------------|
| 2-s2.0-40549088895 | 10.1097/JSM.0b013e318168e6ea      | Training the elite child athlete                                       | Scopus only            | 2008                               | Clinical Journal of Sport Medicine                               |
| 2-s2.0-41949099885 | 10.1016/j.scispo.2008.02.004      |                                                                        | Scopus only            | 2008                               | Science and Sports                                               |
| 2-s2.0-41349100075 | 10.1136/bjism.2007.044016         |                                                                        | Scopus only            | 2008                               | British Journal of Sports Medicine                               |
| 2-s2.0-84965017180 | 10.1136/bjsports-2016-096121      | Harassment and abuse in sport                                          | IOC website and Scopus | 2016                               | British Journal of Sports Medicine                               |
| 2-s2.0-38349053742 | 10.1016/j.csm.2007.10.007         | Molecular basis of connective tissue and muscle injuries in sport      | Scopus only            | 2008                               | Clinics in Sports Medicine                                       |
| 2-s2.0-70350042192 | NA                                | Periodic health evaluation of elite athletes                           | Scopus only            | 2009                               | International SportMed Journal                                   |
| 2-s2.0-69949160086 | 10.1136/bjism.2009.064394         |                                                                        | Scopus only            | 2009                               | British Journal of Sports Medicine                               |
| 2-s2.0-70349673759 | 10.1097/JSM.0b013e3181b7332c      |                                                                        | Scopus only            | 2009                               | Clinical Journal of Sport Medicine                               |
| 2-s2.0-70349297487 | 10.4085/1062-6050-44.5.538        |                                                                        | Scopus only            | 2009                               | Journal of Athletic Training                                     |
| 2-s2.0-0842330606  | NA                                | Sports nutrition                                                       | Scopus only            | 2004                               | Journal of Sports Sciences                                       |
| 2-s2.0-84872195454 | 10.1080/02640414.2011.619349      |                                                                        | Scopus only            | 2011                               | Journal of Sports Sciences                                       |
| 2-s2.0-0347511844  | 10.1123/ijsem.13.4.549            |                                                                        | Scopus only            | 2003                               | International Journal of Sport Nutrition and Exercise Metabolism |
| 2-s2.0-78650429364 | 10.1136/bjism.2010.079822         | The use of platelet-rich plasma                                        | Scopus only            | 2010                               | British Journal of Sports Medicine                               |
| 2-s2.0-80051710300 | 10.1136/bjsports-2011-090228      | Fitness and health in young people through physical activity and sport | Scopus only            | 2011                               | British Journal of Sports Medicine                               |
| 2-s2.0-80053005983 | 10.1136/bjsports-2011-090228corr1 |                                                                        | Scopus only            | 2011                               | British Journal of Sports Medicine                               |
| 2-s2.0-84856929812 | 10.2165/11597140-000000000-00000  | Body composition, health and performance in sport                      | IOC website and Scopus | 2012                               | Sports Medicine                                                  |
| 2-s2.0-84875553245 | 10.1136/bjsports-2013-092313      | Concussion in sport                                                    | IOC website and Scopus | 2013                               | British Journal of Sports Medicine                               |
| 2-s2.0-84876697231 | 10.1016/j.jsams.2013.02.009       |                                                                        | IOC website and Scopus | 2013                               | Journal of Science and Medicine in Sport                         |
| 2-s2.0-84877642908 | 10.1016/j.ptsp.2013.03.002        |                                                                        | IOC website and Scopus | 2013                               | Physical Therapy in Sport                                        |
| 2-s2.0-84876883700 | 10.1016/j.pmrj.2013.02.012        |                                                                        | IOC website and Scopus | 2013                               | PM and R                                                         |
| 2-s2.0-84875140997 | 10.1097/JSM.0b013e31828b67cf      |                                                                        | IOC website and Scopus | 2013                               | Clinical Journal of Sport Medicine                               |
| 2-s2.0-67349137955 | 10.1016/j.jsams.2009.02.004       |                                                                        | Scopus only            | 2009                               | Journal of Science and Medicine in Sport                         |
| 2-s2.0-85040351579 | 10.1136/bjsports-2017-097699      |                                                                        | Scopus only            | 2017                               | British Journal of Sports Medicine                               |
| 2-s2.0-68349089608 | 10.1136/bjism.2009.058248         |                                                                        | Scopus only            | 2009                               | British Journal of Sports Medicine                               |
| 2-s2.0-67650370065 | 10.4085/1062-6050-44.4.434        |                                                                        | Scopus only            | 2009                               | Journal of Athletic Training                                     |
| 2-s2.0-84876667788 | 10.1016/j.jamcol1surg.2013.02.020 |                                                                        | Scopus only            | 2013                               | Journal of the American College of Surgeons                      |
| 2-s2.0-84881167581 | 10.4085/1062-6050-48.4.05         | Scopus only                                                            | 2013                   | Journal of Athletic Training       |                                                                  |
| 2-s2.0-85046368140 | 10.1136/bjsports-2018-099079      | Scopus only                                                            | 2018                   | British Journal of Sports Medicine |                                                                  |
| 2-s2.0-65649134415 | 10.1016/j.pmrj.2                  | Scopus only                                                            | 2009                   | PM and R                           |                                                                  |

| EID                | DOI                               | IOC consensus meeting title                                        | Availability           | Year | Publication                                                      |
|--------------------|-----------------------------------|--------------------------------------------------------------------|------------------------|------|------------------------------------------------------------------|
|                    | 009.03.010                        |                                                                    |                        |      |                                                                  |
| 2-s2.0-65449188700 | 10.1016/j.jocn.2009.02.002        |                                                                    | Scopus only            | 2009 | Journal of Clinical Neuroscience                                 |
| 2-s2.0-76349094484 | 10.3810/psm.2009.06.1721          |                                                                    | Scopus only            | 2009 | Physician and Sportsmedicine                                     |
| 2-s2.0-67651177803 | 10.1097/JSM.0b013e3181a501db      |                                                                    | Scopus only            | 2009 | Clinical Journal of Sport Medicine                               |
| 2-s2.0-77954606550 | 10.1097/JSM.0b013e3181e92350      |                                                                    | Scopus only            | 2010 | Clinical Journal of Sport Medicine                               |
| 2-s2.0-84885732636 | 10.1136/bjsports-2013-093034      |                                                                    | IOC website and Scopus | 2013 | British Journal of Sports Medicine                               |
| 2-s2.0-84887057640 | 10.1007/s40279-013-0104-3         | Prevention and management of non-communicable disease              | IOC website and Scopus | 2013 | Sports Medicine                                                  |
| 2-s2.0-84887083566 | 10.1097/JSM.0000000000000038      |                                                                    | Scopus only            | 2013 | Clinical Journal of Sport Medicine                               |
| 2-s2.0-84932107384 | 10.1136/bjsports-2015-094962      | Youth athletic development                                         | IOC website and Scopus | 2015 | British Journal of Sports Medicine                               |
| 2-s2.0-84965045964 | 10.1136/bjsports-2016-096218      | Pregnancy and the elite athlete                                    | IOC website and Scopus | 2016 | British Journal of Sports Medicine                               |
| 2-s2.0-84928983228 | 10.1136/bjsports-2014-094371      |                                                                    | IOC website and Scopus | 2015 | British Journal of Sports Medicine                               |
| 2-s2.0-84896346538 | 10.1136/bjsports-2014-093502      |                                                                    | IOC website and Scopus | 2014 | British Journal of Sports Medicine                               |
| 2-s2.0-85042051130 | NA                                | Relative energy deficiency in sport (RED-S)                        | IOC website and Scopus | 2018 | Gynakologische Praxis                                            |
| 2-s2.0-85051408464 | 10.1123/ijsem.2018-0136           |                                                                    | Scopus only            | 2018 | International Journal of Sport Nutrition and Exercise Metabolism |
| 2-s2.0-85049153403 | 10.1136/bjsports-2018-099193      |                                                                    | Scopus only            | 2018 | British Journal of Sports Medicine                               |
| 2-s2.0-84985953121 | 10.1136/bjsports-2016-096572      |                                                                    | IOC website and Scopus | 2016 | British Journal of Sports Medicine                               |
| 2-s2.0-84985955410 | 10.1136/bjsports-2016-096581      | Load in sport and risk of injury/illness                           | IOC website and Scopus | 2016 | British Journal of Sports Medicine                               |
| 2-s2.0-84994631104 | 10.1136/bjsports-2016-096583      |                                                                    | Scopus                 | 2016 | British Journal of Sports Medicine                               |
| 2-s2.0-85048219314 | 10.1136/bjsports-2017-097884corr1 | Pain management in elite athletes;                                 | IOC website and Scopus | 2018 | British Journal of Sports Medicine                               |
| 2-s2.0-85028292353 | 10.1136/bjsports-2017-097884      | ERRATUM                                                            | IOC website and Scopus | 2017 | British Journal of Sports Medicine                               |
| 2-s2.0-85044825565 | 10.1136/bjsports-2018-099199      |                                                                    | IOC website and Scopus | 2018 | British Journal of Sports Medicine                               |
| 2-s2.0-85044829017 | 10.1136/bjsports-2018-099027      | Nutritional supplements                                            | IOC website and Scopus | 2018 | British Journal of Sports Medicine                               |
| 2-s2.0-85045508127 | 10.1123/ijsem.2018-0020           |                                                                    | IOC website and Scopus | 2018 | International Journal of Sport Nutrition and Exercise Metabolism |
| 2-s2.0-85044826477 | 10.1136/bjsports-2018-099060      | Prevention, diagnosis & management of paediatric ACL injuries      | Scopus only            | 2018 | British Journal of Sports Medicine                               |
| 2-s2.0-85042065367 | 10.1007/s00167-018-4865-y         |                                                                    | Scopus only            | 2018 | Knee Surgery, Sports Traumatology, Arthroscopy                   |
| 2-s2.0-85045148447 | 10.1177/2325967118759953          |                                                                    | Scopus only            | 2018 | Orthopaedic Journal of Sports Medicine                           |
| 2-s2.0-84865411559 | 10.1136/bjsports-2012-091296      | Thermoregulatory and altitude challenges in the high-level athlete | Scopus only            | 2012 | British Journal of Sports Medicine                               |
| 2-s2.0-77953864176 | 10.1136/bjsm.2010.073122          | Age determination in high-level young athletes                     | Scopus only            | 2010 | British Journal of Sports Medicine                               |
